# Supplementary material for: Trends in the Incidence of Cardiovascular Diagnoses and Procedures over the Years 2012–2021 in Israel: The Impact of the COVID-19 Pandemic
Source: MDPI journal article supplement (doi:10.3390/jcm13020476), 2024-01-15
Supplement: s1 [file s1]

**Supplementary Table S1: ICD-9 codes of Cardiovascular diagnosis and treatments.**

| <b>Diagnosis</b>                                   | <b>ICD-9 codes</b>                                                                                                                                                                                                                                     | <b>Source</b>               |
|----------------------------------------------------|--------------------------------------------------------------------------------------------------------------------------------------------------------------------------------------------------------------------------------------------------------|-----------------------------|
| ST-elevation myocardial infarction (STEMI)         | 410.1%-410.6%, 410.8%                                                                                                                                                                                                                                  | Hospital EMRs               |
| Non-ST-elevation myocardial infarction (non-STEMI) | 410.7%, 410.9%<br>410                                                                                                                                                                                                                                  | Hospital EMRs               |
| Atrial fibrillation (AF)                           | 427.3, 427.31, 427.32, K78                                                                                                                                                                                                                             | Community and Hospital EMRs |
| Congestive heart failure (CHF)                     | 428.0, 428.1<br>428.2, 428.20, 428.21, 428.22, 428.23<br>428.3, 428.31, 428.32, 428.33<br>428.4, 428.40, 428.41, 428.42, 428.43,<br>112.1, 112.3, 112.9<br>398.91, 402.01, 402.11, 402.91, 404.01, 404.03, 404.11, 404.13, 404.91, 404.93, 416. 9, 514 | Community and Hospital EMRs |
| Cerebrovascular accident (CVA)                     | 430, 431, 432, 433%, 434.91, 436, 438.0, 438.1%, 438.2%                                                                                                                                                                                                | Community and Hospital EMRs |
| Ablation                                           | 37.34                                                                                                                                                                                                                                                  | Hospital EMRs               |
| Catheterization                                    | 0066, 0040, 0041, 0042, 0043, 0044, 0045, 0046, 0047, 0048                                                                                                                                                                                             | Hospital EMRs               |
| Coronary artery bypass graft (CABG)                | 36.1, 36.10, 36.15, 36.16, 36.11, 36.12, 36.13                                                                                                                                                                                                         | Hospital EMRs               |
| Pacemaker                                          | 0050, 0053, 37.71, 37.73, 37.81, 37.82, 37.83                                                                                                                                                                                                          | Hospital EMRs               |
| Defibrillator                                      | 0051, 0054, 37.94, 37.98                                                                                                                                                                                                                               | Hospital EMRs               |
